# Supplementary material for: Epizootic ulcerative syndrome causes cutaneous dysbacteriosis in hybrid snakehead (Channa maculata♀ × Channa argus♂)
Source: PeerJ. 2019 Apr 2;7:e6674. doi: 10.7717/peerj.6674 (PMC6450373; doi:10.7717/peerj.6674)
Supplement: Supplemental Information 2 [file peerj-07-6674-s002.xlsx]

## Sheet: Sheet1
Table S1. Genus IDs corresponding to phylogenetic genera
genusID	taxa
g1	125ds10_unidentified_genus
g2	Acetobacteraceae_unidentified_genus
g3	Achromobacter
g4	Acidimicrobiales_unidentified_genus
g5	Acinetobacter
g6	ACK-M1_unidentified_genus
g7	Actinobacteria_unidentified_genus
g8	Actinomycetales_unidentified_genus
g9	Aeromonas
g10	Agrobacterium
g11	Alcaligenaceae_unidentified_genus
g12	Alphaproteobacteria_unidentified_genus
g13	Anaeromusa
g14	Anaerosinus
g15	Anaerovorax
g16	Aquirestis
g17	Arcobacter
g18	Arthrobacter
g19	auto67_4W_unidentified_genus
g20	Bacillaceae_unidentified_genus
g21	Bacillales_unidentified_genus
g22	Bacillus
g23	Bacteriovoracaceae_unidentified_genus
g24	Bacteroidaceae_unidentified_genus
g25	Bacteroidales_unidentified_genus
g26	Bacteroides
g27	Bacteroidetes_unidentified_genus
g28	Betaproteobacteria_unidentified_genus
g29	Blvii28
g30	BPC076_unidentified_genus
g31	Burkholderiales_unidentified_genus
g32	C111_unidentified_genus
g33	C39
g34	Candidatus Aquiluna
g35	Candidatus Xiphinematobacter
g36	Carnobacterium
g37	Caulobacteraceae_unidentified_genus
g38	Cerasicoccaceae_unidentified_genus
g39	Cetobacterium
g40	Chitinophagaceae_unidentified_genus
g41	Chlorophyta_unidentified_genus
g42	Citrobacter
g43	Clavibacter
g44	Cloacibacterium
g45	Clostridiaceae_unidentified_genus
g46	Clostridiales_unidentified_genus
g47	Clostridium
g48	Comamonadaceae_unidentified_genus
g49	Coxiellaceae_unidentified_genus
g50	Cryomorphaceae_unidentified_genus
g51	Cryptophyta_unidentified_genus
g52	Cytophagaceae_unidentified_genus
g53	Dechloromonas
g54	Deltaproteobacteria_unidentified_genus
g55	Desulfarculaceae_unidentified_genus
g56	Desulfobacteraceae_unidentified_genus
g57	Desulfovibrio
g58	Desulfuromonadales_unidentified_genus
g59	Dysgonomonas
g60	EB1017_unidentified_genus
g61	Ellin515_unidentified_genus
g62	Ellin6067_unidentified_genus
g63	Elusimicrobia_unidentified_genus
g64	Elusimicrobiales_unidentified_genus
g65	Escherichia
g66	Eubacterium
g67	Euglenozoa_unidentified_genus
g68	Fimbriimonas
g69	Flavisolibacter
g70	Flavobacteriaceae_unidentified_genus
g71	Flavobacterium
g72	Fluviicola
g73	Fusobacteriaceae_unidentified_genus
g74	Gallionellaceae_unidentified_genus
g75	Gammaproteobacteria_unidentified_genus
g76	Gemm-1_unidentified_genus
g77	Gemmataceae_unidentified_genus
g78	Geobacillus
g79	Geobacter
g80	GIF10_unidentified_genus
g81	GOUTA19
g82	GW-28_unidentified_genus
g83	Halomonas
g84	Holophagaceae_unidentified_genus
g85	Hylemonella
g86	iii1-15_unidentified_genus
g87	Janthinobacterium
g88	JTB215_unidentified_genus
g89	Kaistia
g90	Lachnospiraceae_unidentified_genus
g91	Lactobacillus
g92	Lactococcus
g93	LCP-6
g94	Legionellales_unidentified_genus
g95	Lentisphaeria_unidentified_genus
g96	Leuconostoc
g97	Limnohabitans
g98	Lysobacter
g99	Marinilabiaceae_unidentified_genus
g100	Methylobacterium
g101	Methylocaldum
g102	Methylophilaceae_unidentified_genus
g103	Microbacteriaceae_unidentified_genus
g104	Microvirgula
g105	Moraxellaceae_unidentified_genus
g106	MWH-UniP1_unidentified_genus
g107	Mycobacterium
g108	Myxococcales_unidentified_genus
g109	Nitrosomonadaceae_unidentified_genus
g110	Nitrospira
g111	Novosphingobium
g112	OPB56_unidentified_genus
g113	Opitutus
g114	Oscillospira
g115	Paludibacter
g116	Parabacteroides
g117	Pasteurellaceae_unidentified_genus
g118	PBS-25_unidentified_genus
g119	Pedosphaerales_unidentified_genus
g120	Pelagibacteraceae_unidentified_genus
g121	Pelosinus
g122	Peptostreptococcaceae_unidentified_genus
g123	Phaeospirillum
g124	PHOS-HD29_unidentified_genus
g125	Phycisphaerales_unidentified_genus
g126	Phyllobacteriaceae_unidentified_genus
g127	Pirellulaceae_unidentified_genus
g128	PK329_unidentified_genus
g129	PL-11B10_unidentified_genus
g130	Planctomyces
g131	Planctomycetia_unidentified_genus
g132	Planococcaceae_unidentified_genus
g133	Polynucleobacter
g134	Propionispira
g135	Proteobacteria_unidentified_genus
g136	Pseudomonas
g137	R4-41B_unidentified_genus
g138	Rhizobiales_unidentified_genus
g139	Rhodobacter
g140	Rhodocyclaceae_unidentified_genus
g141	Rhodospirillaceae_unidentified_genus
g142	Rickettsiaceae_unidentified_genus
g143	Rickettsiales_unidentified_genus
g144	Ruminococcaceae_unidentified_genus
g145	Ruminococcus
g146	Saprospiraceae_unidentified_genus
g147	Saprospirales_unidentified_genus
g148	SB-1_unidentified_genus
g149	SBRH58_unidentified_genus
g150	SC-I-84_unidentified_genus
g151	Sediminibacterium
g152	Shewanella
g153	Sinobacteraceae_unidentified_genus
g154	SJA-36_unidentified_genus
g155	Solibacillus
g156	Solibacterales_unidentified_genus
g157	Solirubrobacterales_unidentified_genus
g158	Sphingobacteriales_unidentified_genus
g159	Sphingomonadaceae_unidentified_genus
g160	Sphingomonadales_unidentified_genus
g161	Sphingomonas
g162	Spirobacillales_unidentified_genus
g163	Stenotrophomonas
g164	Stramenopiles_unidentified_genus
g165	Streptococcaceae_unidentified_genus
g166	Streptococcus
g167	Succinispira
g168	Sulfuritalea
g169	Sulfurospirillum
g170	Sutterella
g171	Synechococcus
g172	Syntrophaceae_unidentified_genus
g173	Syntrophobacteraceae_unidentified_genus
g174	Syntrophorhabdaceae_unidentified_genus
g175	Syntrophus
g176	Thermomonas
g177	Thiobacillus
g178	TPD-58_unidentified_genus
g179	Treponema
g180	Veillonellaceae_unidentified_genus
g181	Verruco-5_unidentified_genus
g182	Vogesella
g183	WCHB1-41_unidentified_genus_
g184	Xanthobacter
g185	Xanthomonadaceae_unidentified_genus
g186	ZB2_unidentified_genus
g187	Zoogloea
